# Supplementary material for: Proteomic Response and Quality Maintenance in Postharvest Fruit of Strawberry (Fragaria × ananassa) to Exogenous Cytokinin
Source: PubMed Central journal article supplement (PMC4890429; doi:10.1038/srep27094), 2016-06-01
Supplement: srep27094-s1.pdf [file srep27094-s1.pdf]

**Proteomic Response and Quality Maintenance in Postharvest Fruit of Strawberry (*Fragaria × ananassa*) to Exogenous Cytokinin**

**Running title:** Cytokinin regulatory metabolism of fruit quality

Li Li<sup>1,§</sup> (lili\_1066@163.com)

Dongdong Li<sup>1,§</sup> (leeyiaugsep@126.com)

Zisheng Luo<sup>1,\*</sup> (luozisheng@zju.edu.cn)

Xinhong Huang<sup>2</sup> (1057466531@qq.com)

Xihong Li<sup>2</sup> (lixihong606@163.com)

<sup>1</sup>Zhejiang Key Laboratory for Agro-Food Processing, College of Biosystems Engineering and Food Science, Zhejiang University, Hangzhou 310058, People's Republic of China. <sup>2</sup>Key Laboratory of Food Nutrition and Safety (Ministry of Education), Tianjin University of Science and Technology, Tianjin 300457, People's Republic of China

§ These authors contributed equally to this work.

\* To whom correspondence should be addressed. Prof Z. Luo (College of Biosystems Engineering and Food Science, Zhejiang University, Yuhangtang road 866, West Lake District, Hangzhou 310058, People's Republic of China. Telephone: +86-571-88982175; Fax: +86-571-88982175.)

## **Supplementary figure/table legends**

**Supplementary Figure S1.** Relatively quantitative expression levels of genes involved in primary metabolism in strawberry. The relative expression levels of target genes were calculated with the formula:  $2^{-\Delta\Delta Ct}$ . Data shown are mean  $\pm$  standard deviation ( $n = 3$ ). Different lowercase letters represent statistical significance ( $P < 0.05$ ).

**Supplementary Figure S2.** Relatively quantitative expression levels of genes involved in the volatile biosynthetic metabolism of strawberry. The relative expression levels of target genes were calculated with the formula:  $2^{-\Delta\Delta Ct}$ . Data shown are mean  $\pm$  standard deviation ( $n = 3$ ). Different lowercase letters represent statistical significance ( $P < 0.05$ ).

**Supplementary Figure S3.** Relatively quantitative expression levels of genes involved in the stress response metabolism of strawberry. The relative expression levels of target genes were calculated with the formula:  $2^{-\Delta\Delta Ct}$ . Data shown are mean  $\pm$  standard deviation ( $n = 3$ ). Different lowercase letters represent statistical significance ( $P < 0.05$ ).

**Supplementary Table S1.** Aroma volatiles detected in strawberry at harvest and after storage. Data shown are mean  $\pm$  standard deviation ( $n = 3$ ).

**Supplementary Table S2.** Differentially expressed proteins of the strawberry proteome in response to preharvest CPPU application

**Supplementary Table S3.** Primers used in this study.

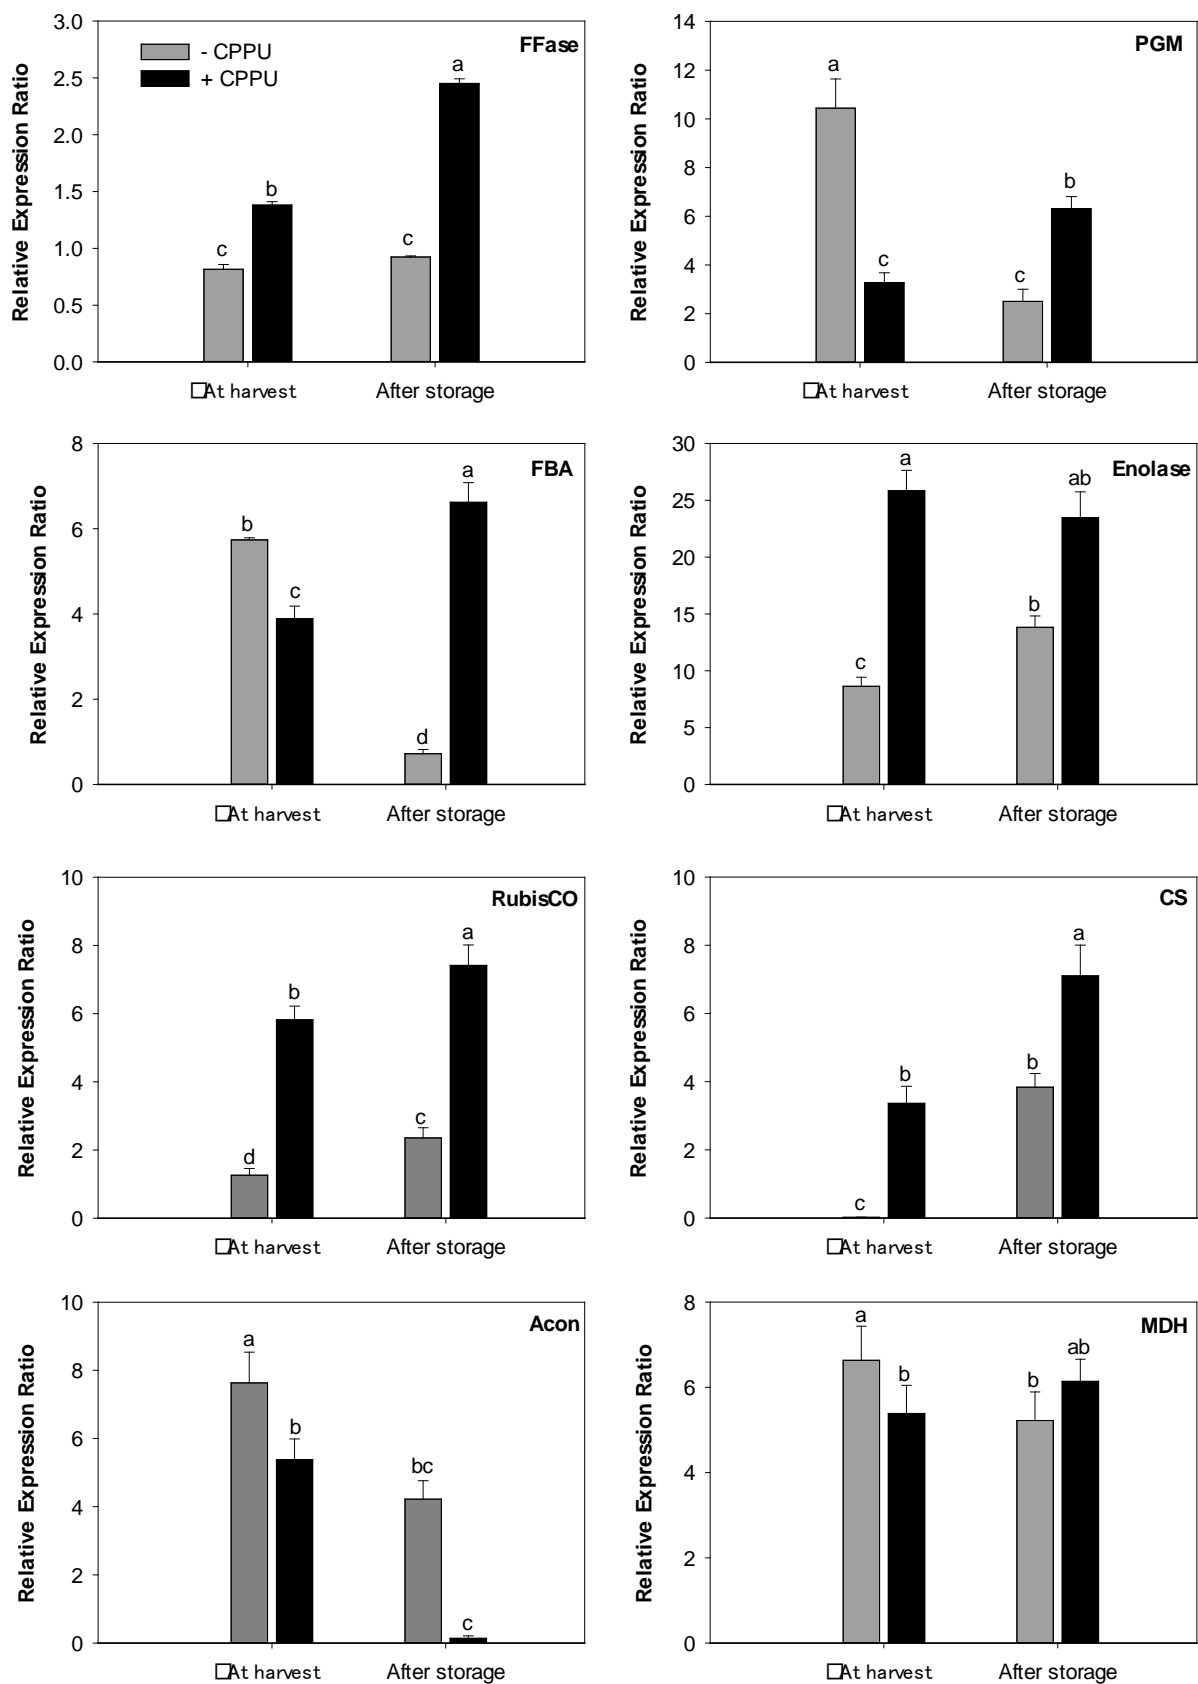

**Supplementary Figure S1.** Relatively quantitative expression levels of genes involved in primary metabolism in strawberry. The relative expression levels of target genes were calculated with the formula:  $2^{-\Delta\Delta C_t}$ . Data shown are mean  $\pm$  standard deviation ( $n = 3$ ). Different lowercase letters represent statistical significance ( $P < 0.05$ ).

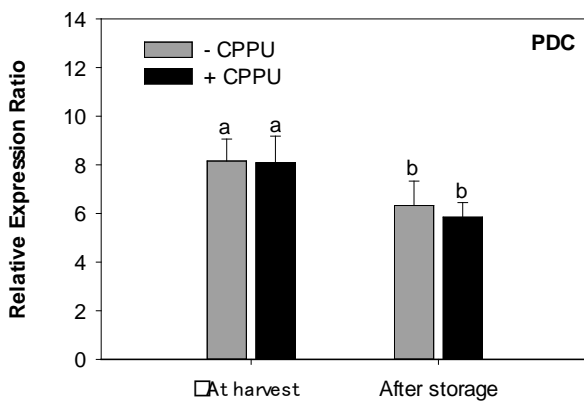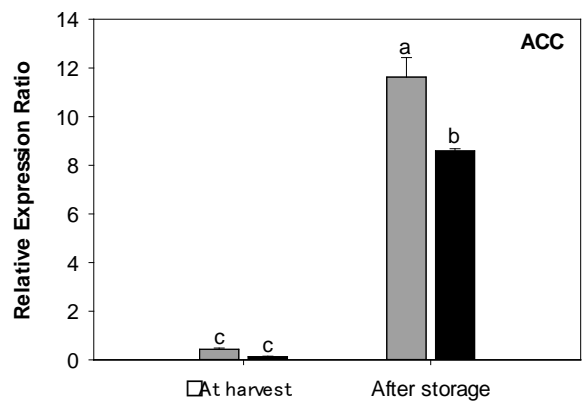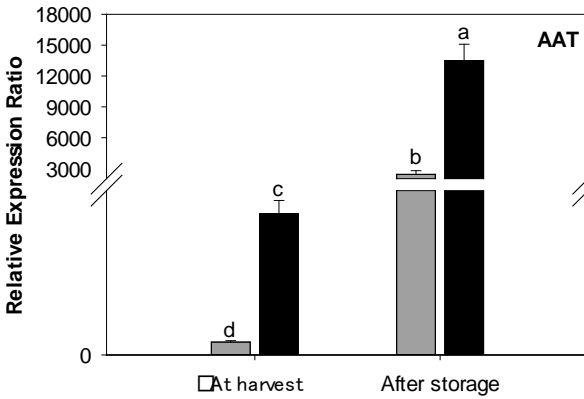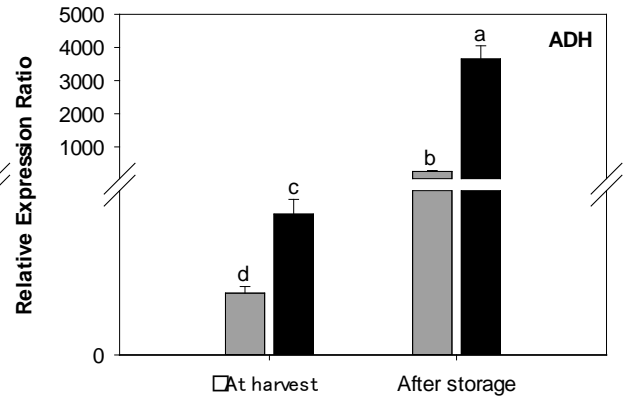

**Supplementary Figure S2.** Relatively quantitative expression levels of genes involved in the volatile biosynthetic metabolism of strawberry. The relative expression levels of target genes were calculated with the formula:  $2^{-\Delta\Delta C_t}$ . Data shown are mean  $\pm$  standard deviation ( $n = 3$ ). Different lowercase letters represent statistical significance ( $P < 0.05$ ).

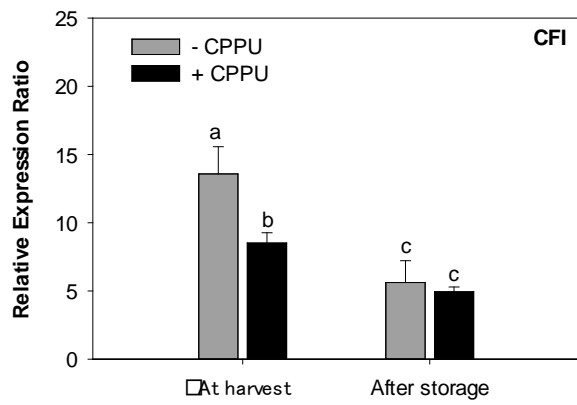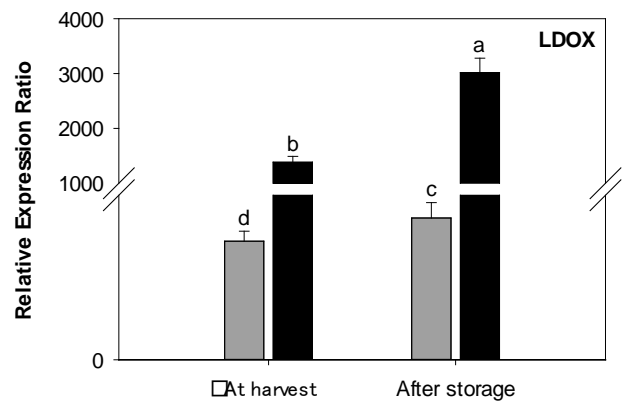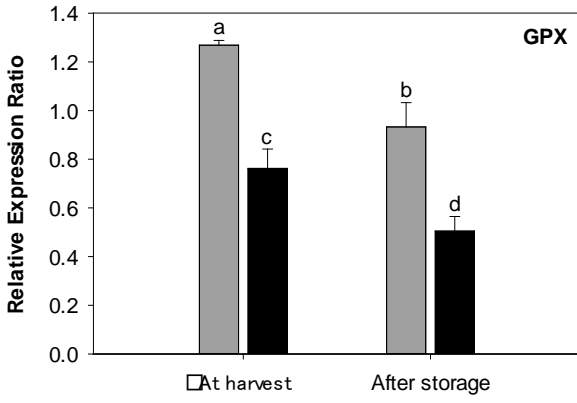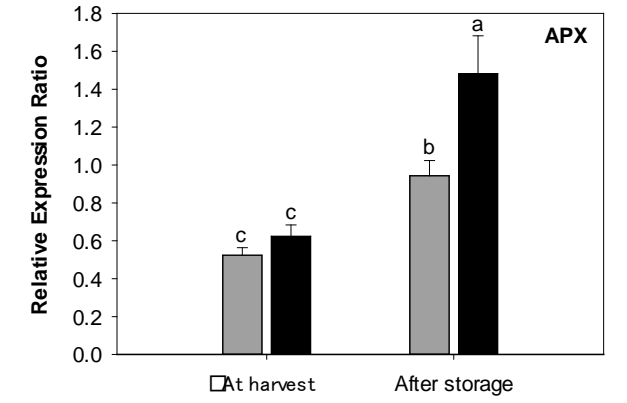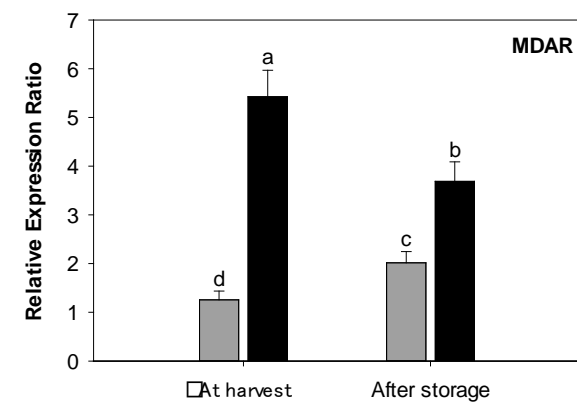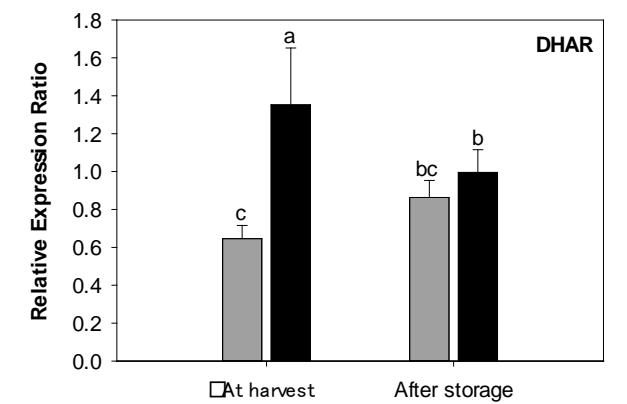

**Supplementary Figure S3.** Relatively quantitative expression levels of genes involved in the stress response metabolism of strawberry. The relative expression levels of target genes were calculated with the formula:  $2^{-\Delta\Delta C_t}$ . Data shown are mean  $\pm$  standard deviation ( $n = 3$ ). Different lowercase letters represent statistical significance ( $P < 0.05$ ).

**Supplementary Table S1.** Aroma volatiles detected in strawberry at harvest and after storage. Data shown are mean  $\pm$  standard deviation ( $n = 3$ ).

|                                     | Odor description <sup>a</sup>  | RI <sup>b</sup> | RI <sup>c</sup> | Retention<br>time (min) | At harvest                   |                  | After storage     |                  |
|-------------------------------------|--------------------------------|-----------------|-----------------|-------------------------|------------------------------|------------------|-------------------|------------------|
|                                     |                                |                 |                 |                         | -CPPU                        | +CPPU            | -CPPU             | +CPPU            |
| <b>Esters</b>                       |                                |                 |                 |                         |                              |                  |                   |                  |
| Methyl butyrate                     | Fruity, sweet                  | 723             | 729             | 4.292                   | 0.00 <sup>d</sup> $\pm$ 0.00 | 0.43 $\pm$ 0.04  | 0.00 $\pm$ 0.00   | 3.07 $\pm$ 0.25  |
| Methyl 3-methylbutanoate            | Fruity, Apple-like odor        | 767             |                 | 5.647                   | 0.00 $\pm$ 0.00              | 0.00 $\pm$ 0.00  | 0.00 $\pm$ 0.00   | 0.33 $\pm$ 0.02  |
| Ethyl hydroxyhexanoate              | Fresh                          | 1329            |                 | 6.351                   | 75.14 $\pm$ 3.51             | 7.43 $\pm$ 0.65  | 25.94 $\pm$ 1.36  | 13.79 $\pm$ 2.02 |
| 2-butoxyethanol acetate             |                                | 1090            |                 | 7.581                   | 10.12 $\pm$ 0.95             | 0.49 $\pm$ 0.05  | 0.36 $\pm$ 0.05   | 0.29 $\pm$ 0.01  |
| Ethyl 2-methylbutanoate             | Sweet, fruity, strawberry      | 820             |                 | 7.962                   | 5.95 $\pm$ 0.27              | 0.50 $\pm$ 0.02  | 0.57 $\pm$ 0.04   | 0.48 $\pm$ 0.02  |
| Ethyl valerate                      | Fruity, orange                 | 871             | 901             | 9.87                    | 1.03 $\pm$ 0.08              | 0.52 $\pm$ 0.03  | 1.50 $\pm$ 0.02   | 14.13 $\pm$ 0.87 |
| 3-methyl pentanoate                 | Sweet, Apple-like              | 946             | 828             | 10.78                   | 8.21 $\pm$ 0.64              | 3.67 $\pm$ 0.01  | 52.31 $\pm$ 7.23  | 16.39 $\pm$ 1.22 |
| Trans-2-methyl-2-butenol            | Fruit, blackcurrant            | 715             | 729             | 11.36                   | 2.65 $\pm$ 0.33              | 0.23 $\pm$ 0.00  | 0.00 $\pm$ 0.00   | 2.32 $\pm$ 0.24  |
| e                                   |                                |                 |                 |                         |                              |                  |                   |                  |
| Ethyl Hexanoate                     | Fruity, strawberry             | 986             | 998             | 13.708                  | 413.39 $\pm$ 21.5            | 34.39 $\pm$ 0.62 | 198.38 $\pm$ 11.9 | 26.49 $\pm$ 3.25 |
| Hexyl acetate                       | Fruity, spicy                  | 1000            | 1009            | 14.236                  | 0.00 $\pm$ 0.00              | 0.33 $\pm$ 0.04  | 0.00 $\pm$ 0.00   | 0.41 $\pm$ 0.04  |
| Methyl phenylacetate                | Honey, Jasmine-like            | 1273            |                 | 20.087                  | 9.52 $\pm$ 0.84              | 2.10 $\pm$ 0.32  | 25.01 $\pm$ 0.36  | 6.46 $\pm$ 0.55  |
| Ethyl Benzoate                      | Chamomile flower, Fruity       | 1145            | 1173            | 20.386                  | 2.91 $\pm$ 0.43              | 0.20 $\pm$ 0.02  | 1.14 $\pm$ 0.20   | 0.00 $\pm$ 0.00  |
| Ethyl octanoate                     | Fruity, Baked fruity,<br>Sweet | 1183            | 1197            | 21.231                  | 19.35 $\pm$ 2.71             | 1.40 $\pm$ 0.11  | 14.64 $\pm$ 1.82  | 1.02 $\pm$ 0.03  |
| 3-hydroxy-4-methyl-ethyl-pentanoate |                                | 1412            | --              | 25.937                  | 2.33 $\pm$ 0.50              | 0.09 $\pm$ 0.01  | 0.74 $\pm$ 0.11   | 0.00 $\pm$ 0.00  |
| Ethyl cinnamate                     | Sweet, honey, fruity           | 1462            | 1467            | 30.479                  | 36.07 $\pm$ 4.56             | 0.00 $\pm$ 0.00  | 8.20 $\pm$ 0.60   | 0.00 $\pm$ 0.00  |
| Ethyl dodecanoate                   | Mango-like                     | 1577            | 1595            | 33.997                  | 2.53 $\pm$ 0.38              | 0.30 $\pm$ 0.02  | 0.61 $\pm$ 0.37   | 0.00 $\pm$ 0.00  |
| <b>Acids</b>                        |                                |                 |                 |                         |                              |                  |                   |                  |
| 3-Heptenoic Acid                    |                                | 1081            |                 | 13.954                  | 0.00 $\pm$ 0.00              | 0.30 $\pm$ 0.03  | 0.00 $\pm$ 0.00   | 0.00 $\pm$ 0.00  |
| Trans-2-hexenoic acid               | Must, fat                      | 1047            |                 | 15.507                  | 13.59 $\pm$ 1.66             | 0.75 $\pm$ 0.06  | 4.36 $\pm$ 0.52   | 1.84 $\pm$ 0.23  |
| Octanoic acid                       | Sweet, cheese                  | 1158            | --              | 20.502                  | 0.00 $\pm$ 0.00              | 0.00 $\pm$ 0.00  | 0.00 $\pm$ 0.00   | 1.65 $\pm$ 0.19  |
| <b>Alcohols</b>                     |                                |                 |                 |                         |                              |                  |                   |                  |

|                                          |                                |      |      |        |               |              |               |               |
|------------------------------------------|--------------------------------|------|------|--------|---------------|--------------|---------------|---------------|
| 1-methylcyclohexanol                     |                                | 918  | 952  | 9.498  | 0.00 ± 0.00   | 0.76 ± 0.05  | 0.00 ± 0.00   | 0.00 ± 0.00   |
| cis-Linalool oxide                       | Sweet, woody, floral           | 1076 | 1137 | 17.173 | 7.35 ± 0.89   | 1.56 ± 0.96  | 4.28 ± 0.26   | 2.16 ± 0.33   |
| Linalool                                 | Muscat, sweet, fruity          | 1109 | 1097 | 17.695 | 127.97 ± 9.31 | 34.67 ± 4.25 | 66.07 ± 0.79  | 27.07 ± 3.21  |
| Cis-3-nonylene-1-ol                      |                                | 1054 | -    | 17.864 | 5.15 ± 0.74   | 0.81 ± 0.07  | 2.48 ± 0.32   | 0.78 ± 0.26   |
| 2-(4-methyl-3-cyclohexenyl)-2-propanol   |                                | 1077 | -    | 21.321 | 24.99 ± 2.12  | 5.18 ± 0.50  | 18.56 ± 1.31  | 6.90 ± 0.31   |
| 1,10-decanediol                          |                                | 1518 | 1549 | 21.634 | 2.68 ± 0.51   | 0.45 ± 0.06  | 1.87 ± 0.25   | 0.62 ± 0.24   |
| 3,7-dimethyl-2,6-octadien-1-ol           | Sweet, fruity, citrus-like     | 1210 | 1230 | 23.231 | 2.79 ± 0.32   | 0.70 ± 0.05  | 2.49 ± 0.30   | 0.49 ± 0.03   |
| 3,7,11-trimethyl-1,6,10-dodecatrien-3-ol | Waxy, floral                   | 1550 | 1563 | 33.232 | 290.29 ± 10.5 | 88.45 ± 6.52 | 253.02 ± 17.6 | 141.34 ± 9.62 |
| <b><u>Terpenes</u></b>                   |                                |      |      |        |               |              |               |               |
| Limonene                                 | Citrus-like, Fruity            | 1048 | 1029 | 14.894 | 2.89 ± 0.40   | 0.60 ± 0.04  | 2.28 ± 0.23   | 1.69 ± 0.11   |
| 1-caryophyllene                          |                                | 1759 | 1419 | 28.943 | 5.86 ± 0.27   | 0.32 ± 0.04  | 2.43 ± 0.18   | 1.31 ± 0.14   |
| Cis-β-farnesene                          | Fruity, Citrus-like, Woody     | 1445 | 1457 | 29.859 | 4.56 ± 0.70   | 0.91 ± 0.07  | 1.35 ± 0.13   | 1.00 ± 0.07   |
| Cis, trans-α-farnesene                   |                                | 1500 | 1506 | 31.555 | 2.96 ± 0.62   | 0.44 ± 0.03  | 1.53 ± 0.14   | 0.83 ± 0.04   |
| <b><u>Furanones</u></b>                  |                                |      |      |        |               |              |               |               |
| Mesifurane                               | Fruity, caramel, green         | 1031 | --   | 16.029 | 468.27 ± 5.52 | 35.49 ± 2.62 | 469.75 ± 20.8 | 127.41 ± 8.62 |
| γ-decalactone                            | Peach, fat                     | 1422 | 1467 | 30.442 | 0.00 ± 0.00   | 0.29 ± 0.03  | 0.00 ± 0.00   | 0.00 ± 0.00   |
| γ-dodecalactone                          | Sweet, fruit, flower           | 1720 | 1678 | 35.924 | 98.75 ± 10.22 | 6.44 ± 0.52  | 53.64 ± 6.31  | 11.64 ± 1.26  |
| <b><u>Others</u></b>                     |                                |      |      |        |               |              |               |               |
| Trans-2-hexenal                          | Apple-like, Fruity, Strawberry | 827  | 855  | 8.172  | 39.78 ± 4.62  | 11.41 ± 0.04 | 17.34 ± 1.62  | 15.40 ± 0.83  |
| Benzaldehyde                             | Almond, burnt sugar            | 965  | 960  | 12.365 | 11.01 ± 1.20  | 1.82 ± 0.35  | 4.01 ± 0.43   | 2.09 ± 0.24   |
| Azulene                                  |                                | 1292 | 1298 | 20.986 | 5.25 ± 0.63   | 1.88 ± 0.23  | 0.00 ± 0.00   | 0.00 ± 0.00   |
| Eugenol                                  | Spicy, honey                   | 1355 | 1359 | 26.778 | 7.25 ± 0.36   | 0.00 ± 0.00  | 4.98 ± 0.30   | 1.16 ± 0.15   |

<sup>a</sup> Odor descriptions according to the Flavornet ([www.flavornet.org](http://www.flavornet.org)) Pherobase databases ([www.pherobase.com](http://www.pherobase.com)).

<sup>b</sup> Calculated retention indices using a series of n-alkanes.

<sup>c</sup> Published retention indices on DB-5 column according to Adams (2001) and the Flavornet database ([www.flavornet.org](http://www.flavornet.org)).

<sup>d</sup> The concentrations of volatiles compounds identified were presented as means of  $\mu\text{g g}^{-1}$  fresh weight of strawberry  $\pm$  standard deviation from three replications.



**Supplementary Table S2** Differentially expressed proteins of the strawberry proteome in response to preharvest CPPU application

| No. <sup>a</sup> | Protein name                                     | Accession number <sup>b</sup> | Mass/pI <sup>c</sup> | Mascot score <sup>d</sup> | Matched peptides number | Sequence coverage (%) | Protein Relative abundance <sup>e</sup>                                               |
|------------------|--------------------------------------------------|-------------------------------|----------------------|---------------------------|-------------------------|-----------------------|---------------------------------------------------------------------------------------|
| <b>Cluster 1</b> |                                                  |                               |                      |                           |                         |                       |                                                                                       |
| 1                | caffeic acid 3-O-methyltransferase-like          | gi 470144514                  | 39.80/5.31           | 231                       | 5                       | 16                    |    |
| 2                | vicilin-like antimicrobial peptides 2-2-like     | gi 470148689                  | 63.73/5.57           | 644                       | 5                       | 24                    |    |
| 3                | annexin D1-like                                  | gi 470103566                  | 36.25/6.43           | 47                        | 1                       | 8                     |    |
| 4                | uncharacterized protein LOC101294513             | gi 470144911                  | 75.22/5.46           | 245                       | 3                       | 26                    |    |
| 5                | uncharacterized protein LOC101292566             | gi 470109570                  | 10.81/4.80           | 661                       | 3                       | 39                    |    |
| 6                | calreticulin-like                                | gi 470132760                  | 47.78/4.43           | 145                       | 1                       | 8                     |   |
| 7                | proteasome subunit beta type-1-like              | gi 470142441                  | 24.38/6.95           | 88                        | 1                       | 6                     |  |
| 8                | translationally-controlled tumor protein homolog | gi 470121591                  | 18.91/4.41           | 86                        | 2                       | 9                     |  |

|    |                                                                            |              |            |     |   |    |                                                                                       |
|----|----------------------------------------------------------------------------|--------------|------------|-----|---|----|---------------------------------------------------------------------------------------|
| 9  | V-type proton ATPase subunit E-like                                        | gi 470125749 | 26.46/8.29 | 157 | 2 | 11 | 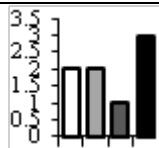    |
| 10 | glyceraldehyde-3-phosphate dehydrogenase-like                              | gi 470149016 | 36.39/8.24 | 379 | 7 | 51 |    |
| 11 | ankyrin repeat domain-containing protein 2-like                            | gi 470107539 | 38.90/4.44 | 148 | 2 | 11 |    |
| 12 | metallothionein-like protein 1-like                                        | gi 470118090 | 6.58/5.07  | 233 | 2 | 15 |    |
| 13 | 5-methyltetrahydropteroyltriglutamate--homocysteine methyltransferase-like | gi 470111481 | 84.58/6.52 | 137 | 2 | 7  |    |
| 14 | alpha-1,4-glucan-protein synthase [UDP-forming]-like                       | gi 470126624 | 41.43/6.02 | 138 | 2 | 7  |    |
| 15 | triosephosphate isomerase, cytosolic-like                                  | gi 470143704 | 27.13/6.34 | 278 | 4 | 19 |   |
| 16 | probable fructose-bisphosphate aldolase 3, chloroplastic-like              | gi 470126093 | 42.65/8.56 | 290 | 3 | 11 |  |
| 17 | pyruvate decarboxylase isozyme 2-like                                      | gi 470133355 | 65.11/5.91 | 452 | 3 | 22 |  |
| 18 | probable protein disulfide-isomerase A6-like                               | gi 470132774 | 39.67/6.11 | 65  | 3 | 14 |  |

|    |                                                                                  |              |            |     |   |    |                                                                                       |
|----|----------------------------------------------------------------------------------|--------------|------------|-----|---|----|---------------------------------------------------------------------------------------|
| 19 | major allergen Pru av 1-like                                                     | gi 470121687 | 17.44/5.39 | 387 | 5 | 38 |     |
| 20 | 60S ribosomal protein L12-like                                                   | gi 470110623 | 17.78/9.00 | 384 | 3 | 22 |    |
| 21 | heat shock cognate 70 kDa protein-like                                           | gi 470146500 | 56.91/5.31 | 163 | 2 | 9  |    |
| 22 | glycinin G4-like                                                                 | gi 470107221 | 57.89/8.08 | 354 | 7 | 34 |    |
| 23 | luminal-binding protein 5-like                                                   | gi 470129154 | 73.66/5.13 | 521 | 4 | 22 |    |
| 24 | elongation factor 1-alpha 1-like                                                 | gi 470148685 | 49.38/9.15 | 126 | 4 | 8  |    |
| 25 | peroxiredoxin-2B-like                                                            | gi 470128097 | 17.48/5.34 | 658 | 4 | 20 |   |
| 26 | 26S protease regulatory subunit 10B homolog A-like                               | gi 470106592 | 44.78/8.25 | 119 | 2 | 12 |  |
| 27 | probable phospholipid hydroperoxide glutathione peroxidase 6, mitochondrial-like | gi 470125537 | 25.30/9.31 | 65  | 2 | 6  |  |
| 28 | 40S ribosomal protein S20-2-like                                                 | gi 470145076 | 13.64/9.51 | 253 | 2 | 18 |  |

|    |                                                                       |              |            |     |   |    |                                                                                       |
|----|-----------------------------------------------------------------------|--------------|------------|-----|---|----|---------------------------------------------------------------------------------------|
| 29 | 14-3-3-like protein-like                                              | gi 470136735 | 29.71/4.75 | 568 | 5 | 31 |     |
| 30 | eukaryotic translation initiation factor 5A-2-like                    | gi 470101329 | 17.39/5.46 | 231 | 4 | 15 |    |
| 31 | ATP synthase subunit beta, mitochondrial-like                         | gi 470127183 | 59.13/6.05 | 134 | 2 | 10 |    |
| 32 | chalcone--flavonone isomerase-like                                    | gi 470144168 | 23.51/4.85 | 492 | 3 | 20 |    |
| 33 | phosphoglucomutase, cytoplasmic-like                                  | gi 470122874 | 62.52/5.74 | 126 | 4 | 14 |    |
| 34 | ubiquitin-conjugating enzyme E2 10-like isoform 2                     | gi 470117130 | 16.48/7.71 | 358 | 3 | 24 |    |
| 35 | cytochrome c oxidase subunit 5b-2, mitochondrial-like isoform 2       | gi 470134221 | 17.71/6.21 | 258 | 3 | 21 |   |
| 36 | glutamine synthetase nodule isozyme-like                              | gi 470104403 | 39.05/5.64 | 88  | 2 | 11 |  |
| 37 | probable mediator of RNA polymerase II transcription subunit 37e-like | gi 470133735 | 70.92/5.11 | 62  | 3 | 5  |  |
| 38 | uncharacterized protein LOC101306848 isoform 3                        | gi 470101465 | 34.80/4.72 | 185 | 2 | 11 |  |

|                  |                                                                                 |              |             |     |   |    |                                                                                       |
|------------------|---------------------------------------------------------------------------------|--------------|-------------|-----|---|----|---------------------------------------------------------------------------------------|
| 39               | uncharacterized protein C167.05-like                                            | gi 470133681 | 18.14/7.92  | 46  | 2 | 5  |     |
| 40               | pectinesterase/pectinesterase inhibitor U1-like                                 | gi 470135930 | 62.84/8.77  | 102 | 2 | 13 |    |
| 41               | aconitate hydratase 2, mitochondrial-like                                       | gi 470103020 | 108.01/7.08 | 308 | 4 | 8  |    |
| 42               | cell division cycle protein 48 homolog                                          | gi 470137394 | 89.52/5.07  | 57  | 1 | 4  |    |
| 43               | flavoprotein WrbA-like                                                          | gi 470114574 | 21.76/5.80  | 112 | 1 | 7  |    |
| 44               | adenine phosphoribosyltransferase 1, chloroplastic-like                         | gi 470109348 | 27.69/5.83  | 230 | 2 | 9  |    |
| 45               | actin-depolymerizing factor 3-like isoform 1                                    | gi 470133856 | 15.81/5.89  | 142 | 2 | 16 |   |
| <b>Cluster 2</b> |                                                                                 |              |             |     |   |    |                                                                                       |
| 1                | LOW QUALITY PROTEIN: dehydrin COR47-like                                        | gi 470109984 | 28.56/5.37  | 85  | 3 | 5  |  |
| 2                | biotin carboxyl carrier protein of acetyl-CoA carboxylase 2, chloroplastic-like | gi 470136935 | 29.54/8.20  | 45  | 1 | 2  |  |

|    |                                                          |              |             |     |    |    |                                                                                       |
|----|----------------------------------------------------------|--------------|-------------|-----|----|----|---------------------------------------------------------------------------------------|
| 3  | leucine aminopeptidase 3, chloroplastic-like             | gi 470101341 | 59.98/7.55  | 474 | 5  | 27 | 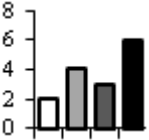    |
| 4  | 26S protease regulatory subunit 6B homolog               | gi 470142843 | 46.03/5.48  | 163 | 2  | 13 |    |
| 5  | cold shock domain-containing protein 4-like              | gi 470107029 | 19.18/5.92  | 99  | 2  | 8  |    |
| 6  | uncharacterized protein LOC101314953                     | gi 470128841 | 40.70/6.92  | 372 | 3  | 28 |    |
| 7  | dihydrolipoyl dehydrogenase 1, mitochondrial-like        | gi 470117795 | 53.98/6.93  | 502 | 5  | 23 |    |
| 8  | tubulin beta-1 chain-like                                | gi 470116123 | 50.25/4.74  | 12  | 2  | 9  |    |
| 9  | staphylococcal nuclease domain-containing protein 1-like | gi 470147845 | 109.33/7.15 | 56  | 1  | 2  |   |
| 10 | uncharacterized protein LOC101298428                     | gi 470129067 | 53.14/5.96  | 83  | 1  | 4  |  |
| 11 | 12S seed storage protein CRU1-like                       | gi 470107217 | 64.49/6.77  | 366 | 10 | 36 |  |
| 12 | thioredoxin H-type-like                                  | gi 470111184 | 13.35/5.22  | 179 | 2  | 7  |  |

|    |                                                                        |              |            |           |    |    |                                                                                       |
|----|------------------------------------------------------------------------|--------------|------------|-----------|----|----|---------------------------------------------------------------------------------------|
| 13 | 60S acidic ribosomal protein P2B-like                                  | gi 470134336 | 11.45/4.56 | 57        | 2  | 4  | 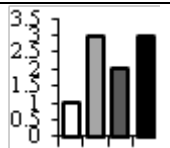    |
| 14 | ruBisCO large subunit-binding protein subunit beta, chloroplastic-like | gi 470117611 | 63.75/5.92 | 54        | 2  | 5  |    |
| 15 | protein GrpE-like                                                      | gi 470116514 | 33.22/5.50 | 273       | 2  | 7  |    |
| 16 | transcription factor BTF3-like isoform 1                               | gi 470126975 | 18.30/5.79 | 425       | 4  | 37 |    |
| 17 | probable calcium-binding protein CML13-like                            | gi 470125402 | 16.63/5.01 | 180       | 2  | 21 |    |
| 18 | heat shock 70 kDa protein, mitochondrial-like                          | gi 470106955 | 73.12/5.77 | 190       | 3  | 14 |    |
| 19 | legumin B-like                                                         | gi 470115872 | 56.53/6.32 | 736       | 20 | 64 |   |
| 20 | legumin A-like                                                         | gi 470107215 | 56.61/6.84 | 437       | 15 | 42 |  |
| 21 | peptidyl-prolyl cis-trans isomerase 1-like                             | gi 470107009 | 18.27/8.53 | <b>58</b> | 2  | 3  |  |
| 22 | uncharacterized protein LOC101304165                                   | gi 470113601 | 57.00/5.96 | 332       | 4  | 16 |  |

|    |                                                                                                                |              |            |     |    |    |                                                                                       |
|----|----------------------------------------------------------------------------------------------------------------|--------------|------------|-----|----|----|---------------------------------------------------------------------------------------|
| 23 | malate dehydrogenase, mitochondrial-like                                                                       | gi 470115832 | 35.62/8.46 | 631 | 8  | 46 |     |
| 24 | enolase-like                                                                                                   | gi 470134388 | 47.94/5.76 | 426 | 5  | 27 |    |
| 25 | >gi 470137735 ref XP_004304618.1  PREDICTED: quinone oxidoreductase-like protein At1g23740, chloroplastic-like | gi 470137735 | 34.19/5.72 | 724 | 18 | 72 |    |
| 26 | cysteine proteinase inhibitor 12-like isoform 1                                                                | gi 470143070 | 26.29/6.17 | 104 | 2  | 9  |    |
| 27 | 12S seed storage protein CRU2-like                                                                             | gi 470127983 | 35.82/5.25 | 358 | 3  | 22 |    |
| 28 | leucoanthocyanidin dioxygenase-like                                                                            | gi 470125461 | 42.86/5.48 | 90  | 2  | 6  |    |
| 29 | non-functional NADPH-dependent codeinone reductase 2-like                                                      | gi 470126493 | 36.14/5.93 | 389 | 5  | 26 |   |
| 30 | L-ascorbate peroxidase, cytosolic-like                                                                         | gi 470117066 | 27.28/5.68 | 520 | 6  | 35 |  |
| 31 | uncharacterized protein LOC101299909 isoform 1                                                                 | gi 470106646 | 17.17/6.33 | 235 | 4  | 23 |  |
| 32 | malate dehydrogenase, cytoplasmic-like                                                                         | gi 470120564 | 35.60/6.01 | 44  | 4  | 41 |  |



|                  |                                                                        |              |            |     |   |    |                                                                                       |
|------------------|------------------------------------------------------------------------|--------------|------------|-----|---|----|---------------------------------------------------------------------------------------|
| 33               | phosphoglycerate kinase, cytosolic-like                                | gi 470141725 | 42.29/6.20 | 611 | 9 | 43 | 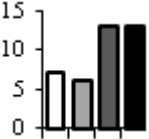    |
| 34               | vicilin-like antimicrobial peptides 2-1-like                           | gi 470112718 | 58.50/6.93 | 560 | 7 | 26 |    |
| 35               | protein disulfide-isomerase-like                                       | gi 470109183 | 55.86/4.94 | 80  | 7 | 35 |    |
| 36               | nascent polypeptide-associated complex subunit alpha-like protein-like | gi 470141512 | 21.93/4.30 | 53  | 3 | 7  |    |
| 37               | 26S proteasome non-ATPase regulatory subunit 4-like                    | gi 470107043 | 42.74/4.40 | 317 | 2 | 13 |    |
| 38               | legumin A-like                                                         | gi 470107219 | 62.76/8.18 | 260 | 6 | 24 |    |
| <b>Cluster 3</b> |                                                                        |              |            |     |   |    |                                                                                       |
| 1                | fructose-bisphosphate aldolase cytoplasmic isozyme-like                | gi 470134363 | 38.58/7.61 | 47  | 1 | 3  |   |
| 2                | mitochondrial-processing peptidase subunit alpha-like                  | gi 470133998 | 54.17/5.90 | 89  | 1 | 6  |  |
| 3                | monodehydroascorbate reductase-like                                    | gi 470134340 | 47.12/6.22 | 71  | 1 | 3  |  |

|    |                                                                                                                         |              |             |     |   |    |                                                                                       |
|----|-------------------------------------------------------------------------------------------------------------------------|--------------|-------------|-----|---|----|---------------------------------------------------------------------------------------|
| 4  | uncharacterized protein LOC101293933                                                                                    | gi 470144907 | 11.39/9.09  | 148 | 1 | 14 | 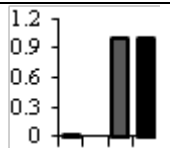    |
| 5  | 20 kDa chaperonin, chloroplastic-like                                                                                   | gi 470102438 | 26.14/9.03  | 63  | 1 | 9  |    |
| 6  | dihydrolipoyllysine-residue succinyltransferase component of 2-oxoglutarate dehydrogenase complex 2, mitochondrial-like | gi 470103044 | 50.79/9.16  | 101 | 1 | 7  |    |
| 7  | histone H2A-like                                                                                                        | gi 470116850 | 16.26/10.66 | 265 | 1 | 11 |    |
| 8  | non-specific lipid-transfer protein-like isoform 1                                                                      | gi 470133509 | 11.66/9.44  | 42  | 1 | 6  |    |
| 9  | unknown protein DS12 from 2D-PAGE of leaf, chloroplastic-like                                                           | gi 470142759 | 31.08/5.19  | 85  | 1 | 5  |    |
| 10 | peptidyl-prolyl cis-trans isomerase FKBP12-like                                                                         | gi 470108216 | 11.96/5.79  | 93  | 1 | 3  |   |
| 11 | peptide methionine sulfoxide reductase-like                                                                             | gi 470126390 | 21.54/7.00  | 326 | 2 | 11 |  |
| 12 | obg-like ATPase 1-like                                                                                                  | gi 470115595 | 44.46/6.40  | 92  | 1 | 4  |  |
| 13 | uncharacterized protein LOC101290918                                                                                    | gi 470147857 | 83.55/5.55  | 55  | 1 | 5  |  |

|    |                                                      |              |            |     |   |    |                                                                                       |
|----|------------------------------------------------------|--------------|------------|-----|---|----|---------------------------------------------------------------------------------------|
| 14 | 40S ribosomal protein S12-like                       | gi 470101313 | 15.52/5.29 | 69  | 1 | 7  | 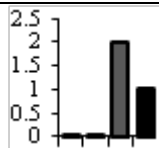    |
| 15 | dnaJ protein homolog                                 | gi 470110519 | 46.51/6.19 | 260 | 2 | 12 |    |
| 16 | dihydrofolate reductase-like                         | gi 470101485 | 30.66/6.66 | 115 | 1 | 3  |    |
| 17 | polyadenylate-binding protein 2-like                 | gi 470136476 | 70.96/8.38 | 131 | 1 | 2  |    |
| 18 | proteasome subunit beta type-4-like                  | gi 470148670 | 27.22/7.71 | 268 | 1 | 14 |    |
| 19 | inositol-tetrakisphosphate 1-kinase 1-like           | gi 470146922 | 35.45/5.68 | 82  | 1 | 3  |    |
| 20 | UBA and UBX domain-containing protein At4g15410-like | gi 470114245 | 32.55/5.25 | 99  | 1 | 4  |   |
| 21 | V-type proton ATPase subunit G-like isoform 2        | gi 470137340 | 12.17/9.29 | 75  | 1 | 5  |  |
| 22 | heat shock cognate protein 80-like                   | gi 470117509 | 80.11/4.97 | 116 | 2 | 11 |  |
| 23 | heat shock 70 kDa protein 15-like                    | gi 470134139 | 93.48/5.11 | 137 | 1 | 5  |  |

|    |                                                                                                                 |              |            |     |   |    |                                                                                       |
|----|-----------------------------------------------------------------------------------------------------------------|--------------|------------|-----|---|----|---------------------------------------------------------------------------------------|
| 24 | thiol protease aleurain-like                                                                                    | gi 470102394 | 39.42/6.26 | 85  | 1 | 4  | 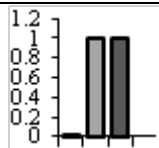    |
| 25 | endoglucanase 8-like                                                                                            | gi 470122866 | 54.92/9.11 | 43  | 1 | 3  |    |
| 26 | dihydrolipoyllysine-residue acetyltransferase component 3 of pyruvate dehydrogenase complex, mitochondrial-like | gi 470135736 | 58.48/7.60 | 146 | 2 | 8  |    |
| 27 | mitochondrial outer membrane protein porin 4-like                                                               | gi 470120659 | 29.48/8.95 | 165 | 1 | 5  |    |
| 28 | 21 kDa protein-like                                                                                             | gi 470122868 | 21.78/6.27 | 291 | 1 | 6  |    |
| 29 | aspartic proteinase nepenthesin-2-like                                                                          | gi 470135396 | 49.96/8.32 | 292 | 1 | 19 |    |
| 30 | beta-fructofuranosidase, insoluble isoenzyme CWINV1-like                                                        | gi 470123049 | 64.79/9.17 | 350 | 1 | 10 |   |
| 31 | late embryogenesis abundant protein 2-like                                                                      | gi 470134229 | 17.69/9.36 | 107 | 1 | 9  |  |
| 32 | citrate synthase, mitochondrial-like isoform 1                                                                  | gi 470141536 | 52.06/7.69 | 68  | 1 | 4  |  |
| 33 | uncharacterized protein At2g27730, mitochondrial-like                                                           | gi 470113710 | 10.76/7.91 | 440 | 2 | 36 |  |

|    |                                                                                      |              |             |     |   |    |                                                                                       |
|----|--------------------------------------------------------------------------------------|--------------|-------------|-----|---|----|---------------------------------------------------------------------------------------|
| 34 | C2 domain-containing protein At1g63220-like isoform 1                                | gi 470142243 | 28.13/4.87  | 224 | 2 | 12 | 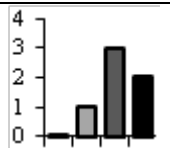    |
| 35 | adenosine kinase 2-like                                                              | gi 470137378 | 37.33/5.14  | 63  | 2 | 8  |    |
| 36 | uncharacterized protein LOC101302504                                                 | gi 525345151 | 14.89/5.19  | 107 | 1 | 4  |    |
| 37 | proteasome subunit alpha type-2-A-like                                               | gi 470115143 | 25.52/5.22  | 81  | 1 | 7  |    |
| 38 | 40S ribosomal protein S18-like                                                       | gi 470126286 | 17.65/10.56 | 189 | 1 | 5  |    |
| 39 | acetyl-coenzyme A carboxylase carboxyl transferase subunit alpha, chloroplastic-like | gi 470133575 | 83.84/8.77  | 95  | 2 | 3  |    |
| 40 | 1-Cys peroxiredoxin-like                                                             | gi 470122127 | 24.30/6.31  | 251 | 3 | 15 |   |
| 41 | malate dehydrogenase, chloroplastic-like                                             | gi 470126765 | 42.91/6.55  | 56  | 2 | 17 |  |

<sup>a</sup> Protein no. and order correspond to the hierarchical clustering analysis in Fig. 4.

<sup>b</sup> Accession numbers from the NCBI *Viridiplantae* database.

<sup>c</sup> Experimental mass (kDa) and isoelectric point (pI) of identified proteins.

<sup>d</sup> Mascot score reported after searching against the NCBI *Viridiplantae* database.

<sup>e</sup> Relative abundances of normalized protein expression; values are expressed as the mean of three replications. White, light grey, dark grey, and black

bars show the abundance in strawberry at harvest without CPPU (AH–CPPU), at harvest with CPPU (AH+CPPU), after storage without CPPU (AS–CPPU), and after storage with CPPU application (AS+CPPU), respectively.

**Supplementary Table S3.** Primers used in this study.

| Gene    | Forward (5'–3')           | Reverse (5'–3')          |
|---------|---------------------------|--------------------------|
| FFase   | AGGCAAGGAGTGCATAACAG      | ATAAGTAGATGGGTACATACAAGA |
| PGM     | CTCACTTCCTCACCGTCAAA      | CCGCTGGTTCCCGTCTT        |
| FBA     | GATGTCTTGAACGAGGGTGG      | CCTGGCAGATGATAGCATAACG   |
| Enolase | GCTTTGATCGGCAAGGACC       | GCAGGAACAGGCAACACCA      |
| RubisCO | GCAGGCTGAAACAGGTGAA       | ACGGTGGATGTGAAGAAGTAGA   |
| CS      | CTTTGAAGCACTTGCCTGAC      | CCCGATACTCCTTGAGACCC     |
| Acon    | TTCAACACTAACGGCTTACTCTACC | CCAGCTACTCCCAAACCATC     |
| MDH     | GAGAAACCCGTCCGTGAGC       | CAACAAGTGACAGGGAATGAGTAA |
| PDC     | CCAAGGTGCGTTGCGAAGA       | GGCAGCAGAAACCCTAGACCC    |
| ACC     | GATCCCGCTCCTGTTAGT        | CTTGAAGAAGACTCTGCCCTA    |
| AAT     | GATGGAGGAACGGCAGAC        | TGGCTTGGGCACGGACT        |
| ADH     | TGAAGTTACGGAAGTAGGGAGC    | AAGAGGCAAGTTGTCTGGGAT    |
| CFI     | ACGACAACCTCCACCAAACC      | CACGGCCTTATCCTCCAAGTA    |
| LDOX    | GCCTCAAACACCTTCCGACTA     | TCCAGCCTCCCTTCTTCTAATC   |
| GPX     | AAATCCTCACTTGGGTCCTC      | GTAGCAGCTCTTGCATAAACAC   |
| APX     | AAATACGCTGCGGATGAAGA      | AGAAACAACACCAACTGCCTAAA  |
| MDAR    | GCTGTGATTGTTGGAGGAGG      | GCACCAGGGTTCAGGGTA       |
| DHAR    | CCTGAGCCGCCTTTGACA        | GGCCCATTTAATTTGAGGTAATC  |
| Actin   | TGGGTTTGCTGGAGATGAT       | CAGTAGGAGA ACTGGGTGC     |
